# Supplementary material
Source: PubMed Central journal article supplement (PMC5644466)

Supplemental figure e-1. Baseline CBCL Attention problems versus Baseline CPT Confidence Index scores ( $p < 0.001$ )

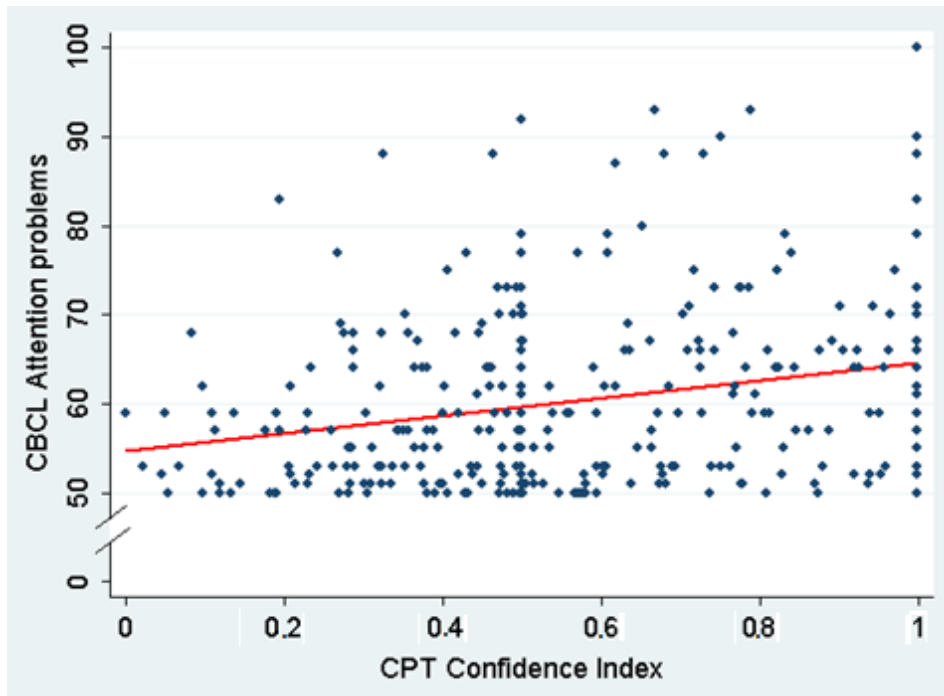

Supplement: supp_WNL.0000000000004514_Figure_e-1.pdf [file supp_WNL.0000000000004514_Figure_e-1.pdf]
